# Supplementary material for: Online Interest in Urology Residency: A Comprehensive Analysis of Current Internet Temporal and Geographic Patterns
Source: MDPI journal article supplement (doi:10.3390/ime3020014), 2024-05-03
Supplement: s1 [file s1]

Supplemental Material

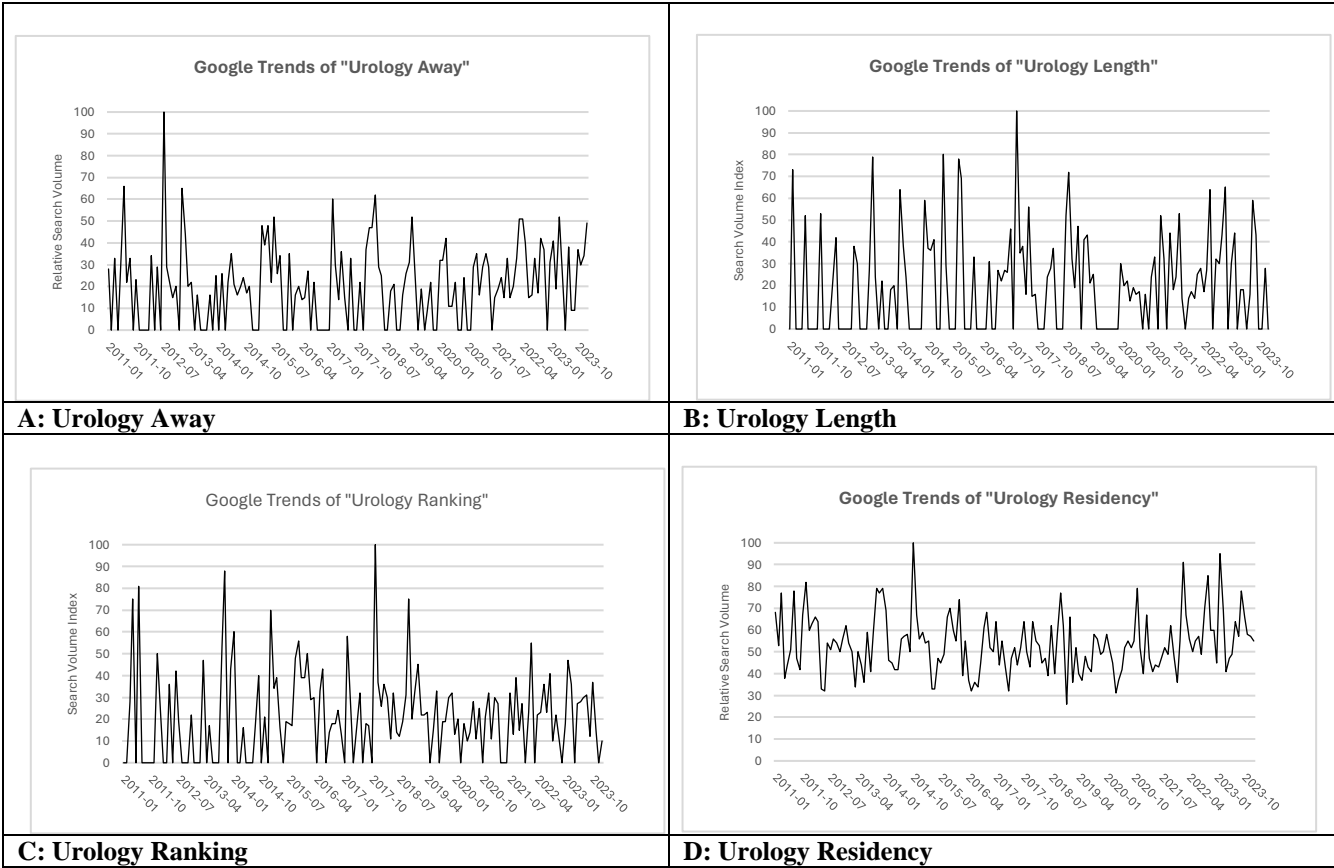

**Supplemental Figure S1.** Google Trends search volume index (SVI) for search term results over time from January 2011 to January 2024.
